# Supplementary material
Source: PubMed Central journal article supplement (PMC5673108)
Supplement: NIHMS916523-supplement-Supplemental_Information.pdf [file NIHMS916523-supplement-Supplemental_Information.pdf]

# **Manganese and Cobalt in the Nonheme Metal-binding Site of a Biosynthetic Model of Heme-Copper Oxidase Superfamily Confer Oxidase Activity through Redox-inactive Mechanism**

Julian H. Reed,<sup>1</sup> Yelu Shi,<sup>2</sup> Qianhong Zhu,<sup>3</sup> Saumen Chakraborty,<sup>4</sup> Evan N. Mirts,<sup>5</sup> Igor D. Petrik,<sup>6</sup> Ambika Bhagi-Damodaran,<sup>7</sup> Matthew Ross,<sup>8</sup> Pierre Moënne-Loccoz,<sup>3\*</sup> Yong Zhang,<sup>2\*</sup> and Yi Lu<sup>1,5,6\*</sup>

1 Department of Biochemistry, University of Illinois at Urbana-Champaign, Urbana, IL, 61801, USA

2 Department of Biomedical Engineering, Chemistry, and Biological Sciences, Stevens Institute of Technology, Hoboken, NJ, 07030, USA

3 Division of Environmental & Biomolecular Systems, Institute of Environmental Health, Oregon Health & Science University, Portland, OR, 97239, USA

4 Department of Chemistry & Biochemistry, University of Mississippi, Oxford, Mississippi, 38677, USA

5 Center for Biophysics and Quantitative Biology, University of Illinois at Urbana-Champaign, Urbana, IL, 61801, USA

6 Department of Chemistry, University of Illinois at Urbana-Champaign, Urbana, IL, 61801, USA

7 Department of Pharmaceutical Chemistry, University of California, San Francisco, San Francisco, CA, 94143, USA

8 Department of Chemistry, Northwestern University, Evanston, IL, 60208, USA

\* Corresponding authors, email: [yi-lu@illinois.edu](mailto:yi-lu@illinois.edu); [yong.zhang@stevens.edu](mailto:yong.zhang@stevens.edu); [moennelo@ohsu.edu](mailto:moennelo@ohsu.edu)

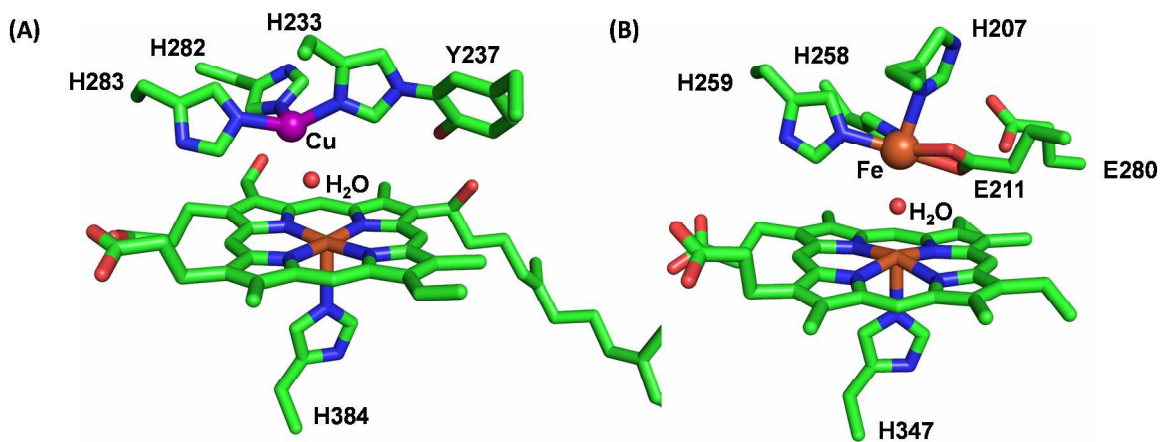

**Figure S1.** Crystal structures of (A) ba3 oxidase (PDB code 1XME) and (B) cNOR (PDB code 3O0R). Water molecules are shown as small red spheres, while nonheme metal ions are depicted as large purple and red spheres for copper and iron, respectively.

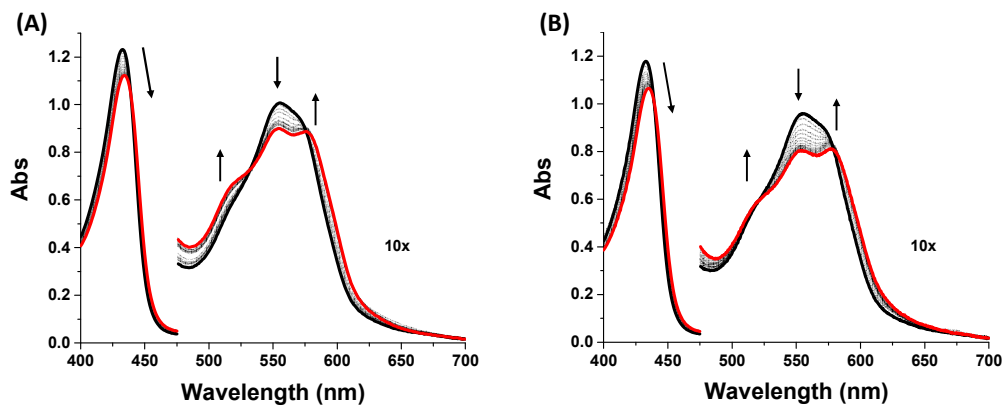

**Figure S2.** Nonheme metal titrations to Fe<sub>B</sub>Mb using (A) MnCl<sub>2</sub> and (B) CoCl<sub>2</sub>. Arrows represent the change in spectra upon addition of nonheme metal, with starting spectrum (black), transitioning to the final spectrum (red). Molar equivalents of nonheme metal used were: 0.2, 0.4, 0.6, 0.8, 1, 1.5, 2, 2.5, 3, 4, and 5. The proteins were in a buffer solution of 50 mM Bis Tris pH 7.

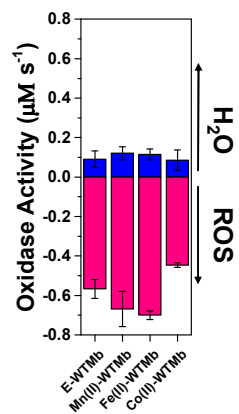

**Figure S3.** Oxidase activity of 18 µM WTMB in 100 mM potassium phosphate buffer pH 6 with 250 µM O<sub>2</sub>, 1.8 mM TMPD, 18 mM ascorbate, and different nonheme metals added. The measured rates of O<sub>2</sub> reduction forming either water (blue) or ROS (red) are shown. Error bars indicate standard deviation.

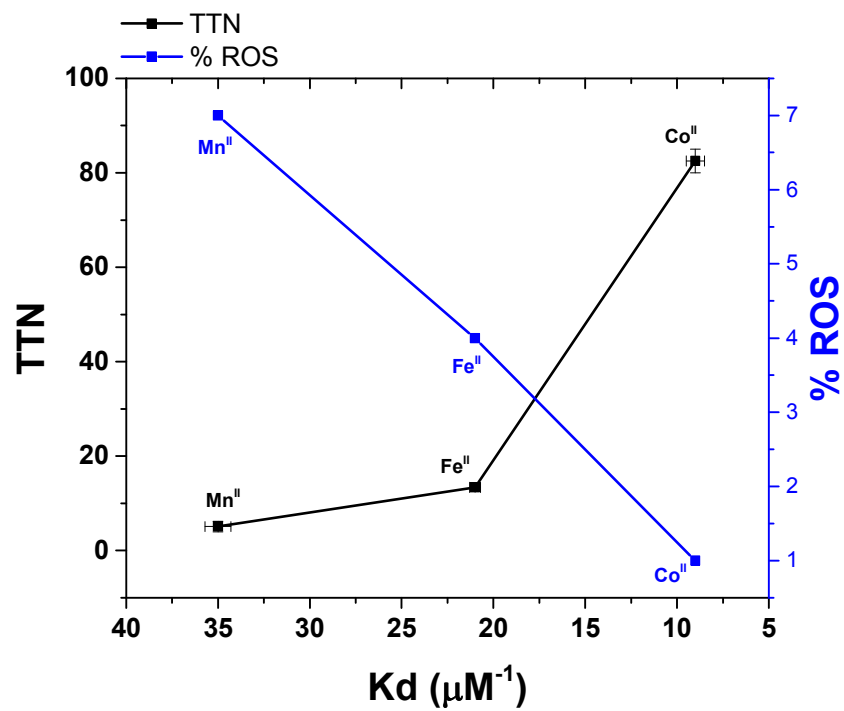

**Figure S4.** Comparison of TTN and % ROS formation at 18  $\mu\text{M}$  protein during  $\text{O}_2$  reduction to the dissociation constant ( $K_d$ ) for each nonheme metal variant of  $\text{Fe}_B\text{Mb}(\text{Fe}^{\text{II}})$ . Each data point is labeled with its corresponding nonheme metal.

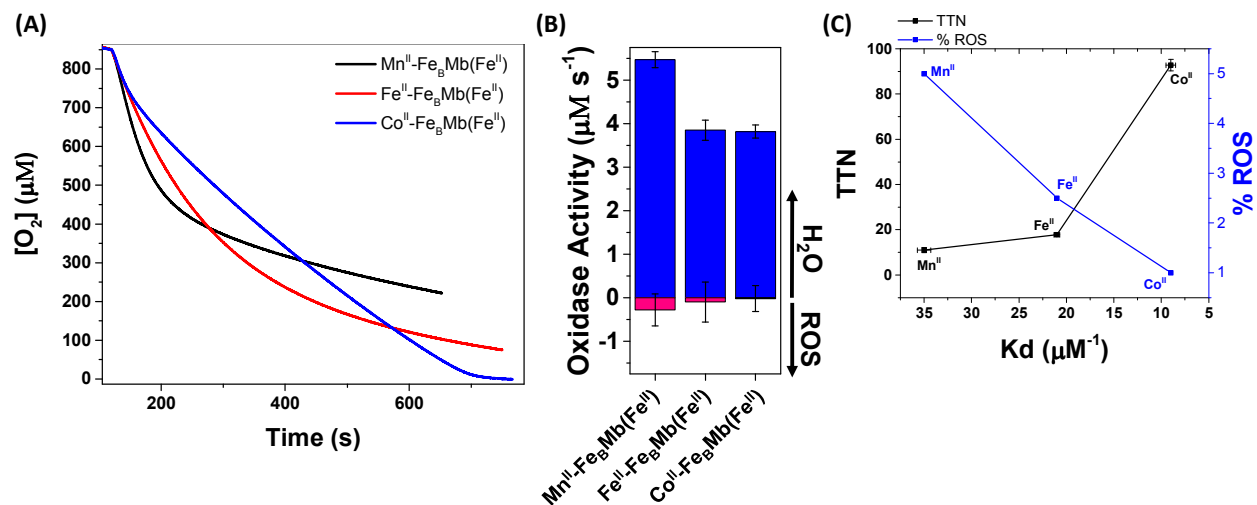

**Figure S5.** (A) O<sub>2</sub> consumption traces of Mn<sup>II</sup>-Fe<sub>8</sub>Mb(Fe<sup>II</sup>) (black), Fe<sup>II</sup>-Fe<sub>8</sub>Mb(Fe<sup>II</sup>) (red), and Co<sup>II</sup>-Fe<sub>8</sub>Mb(Fe<sup>II</sup>) (blue) carried out using 40 μM protein. (B) O<sub>2</sub> consumption rates for the three protein variants. (C) Comparison of TTN and % ROS formation at 40 μM protein during O<sub>2</sub> reduction to the dissociation constant (K<sub>d</sub>) for each nonheme metal variant of Fe<sub>8</sub>Mb(Fe<sup>II</sup>). Each data point is labeled with its corresponding nonheme metal.

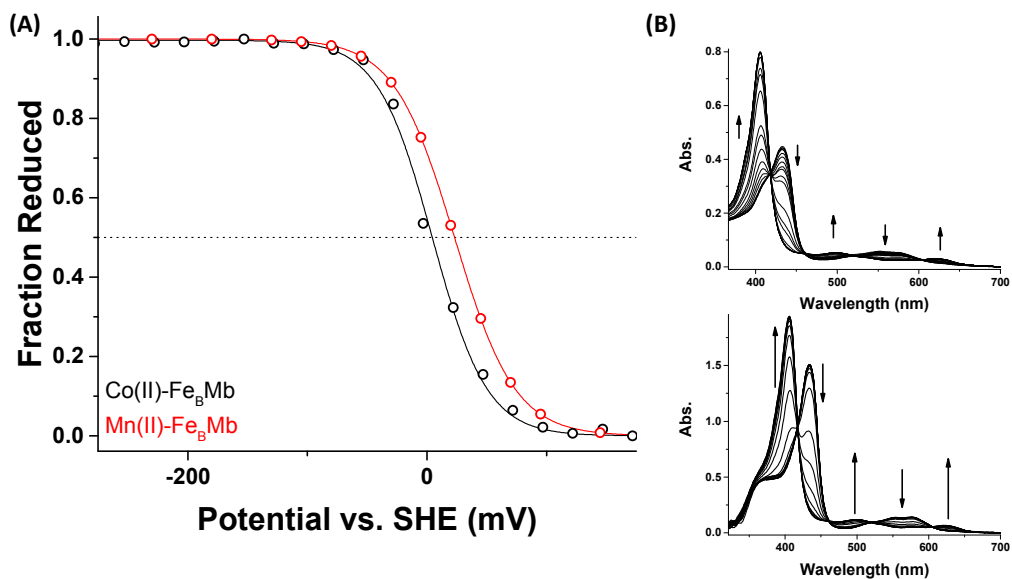

**Figure S6.** (A) Nernst fit of the spectroelectrochemical plot for  $\text{Mn}^{\text{II}}$ - and  $\text{Co}^{\text{II}}$ - $\text{Fe}_B\text{Mb}(\text{Fe}^{\text{II}})$ . The center dotted line indicates the point at which the fraction of reduced and oxidized protein is equal, and corresponds to the heme redox potential. (B) Spectroelectrochemical measurements of the  $\text{Fe}_B\text{Mb}$  heme reduction potential with  $\text{Mn}^{\text{II}}$  (top) and  $\text{Co}^{\text{II}}$  bottom bound at the nonheme site.

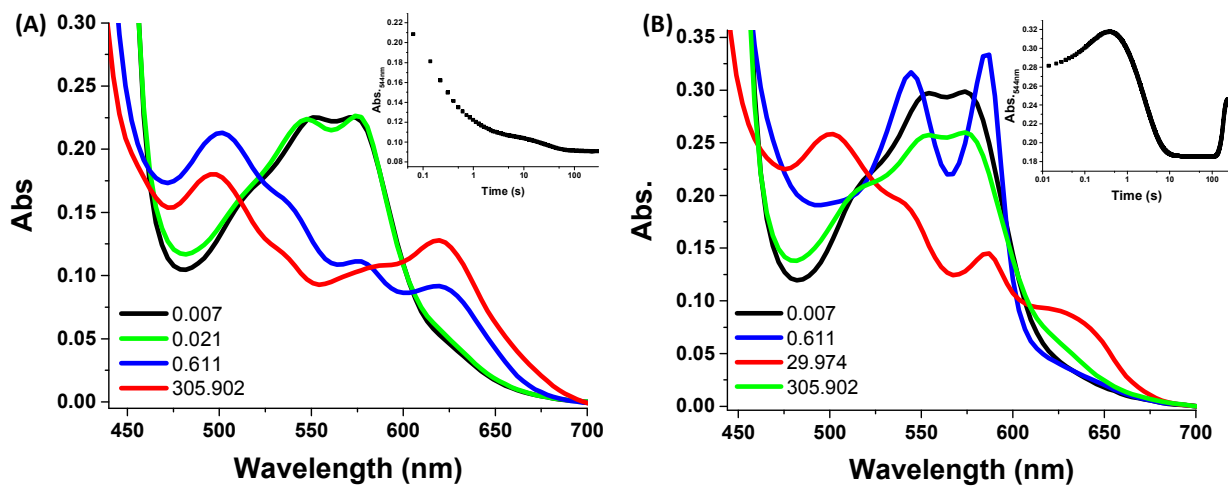

**Figure S7.** Stopped-flow UV/Vis spectra of the reaction of  $\sim 50 \mu\text{M}$  (A)  $\text{Mn}^{\text{II}}$ - and (B)  $\text{Co}^{\text{II}}$ - $\text{Fe}_\text{B}$  Mb( $\text{Fe}^{\text{II}}$ ) mixed with  $\text{O}_2$ -saturated 100 mM potassium phosphate pH 6 in the presence of 5 mM/50 mM TMPD/ascorbate. The insets show a time trace at 544 nm.



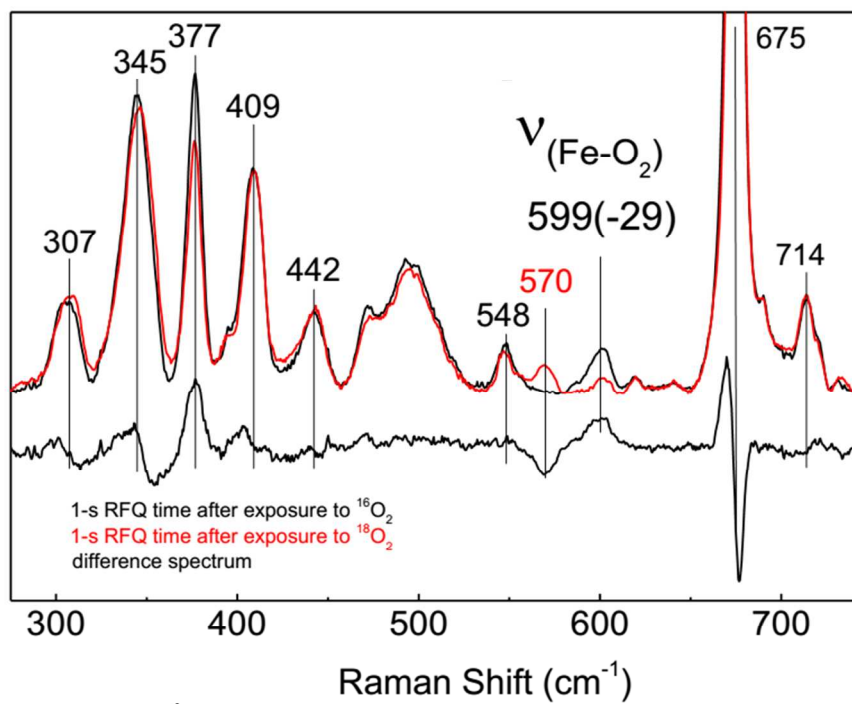

**Figure S8.** Low-frequency RR spectra of  $\text{Co}^{\text{II}}\text{-FeBMb}(\text{Fe}^{\text{II}}\text{-O}_2)$  prepared similarly to as described for Figure 5, and collected at 407 nm excitation.

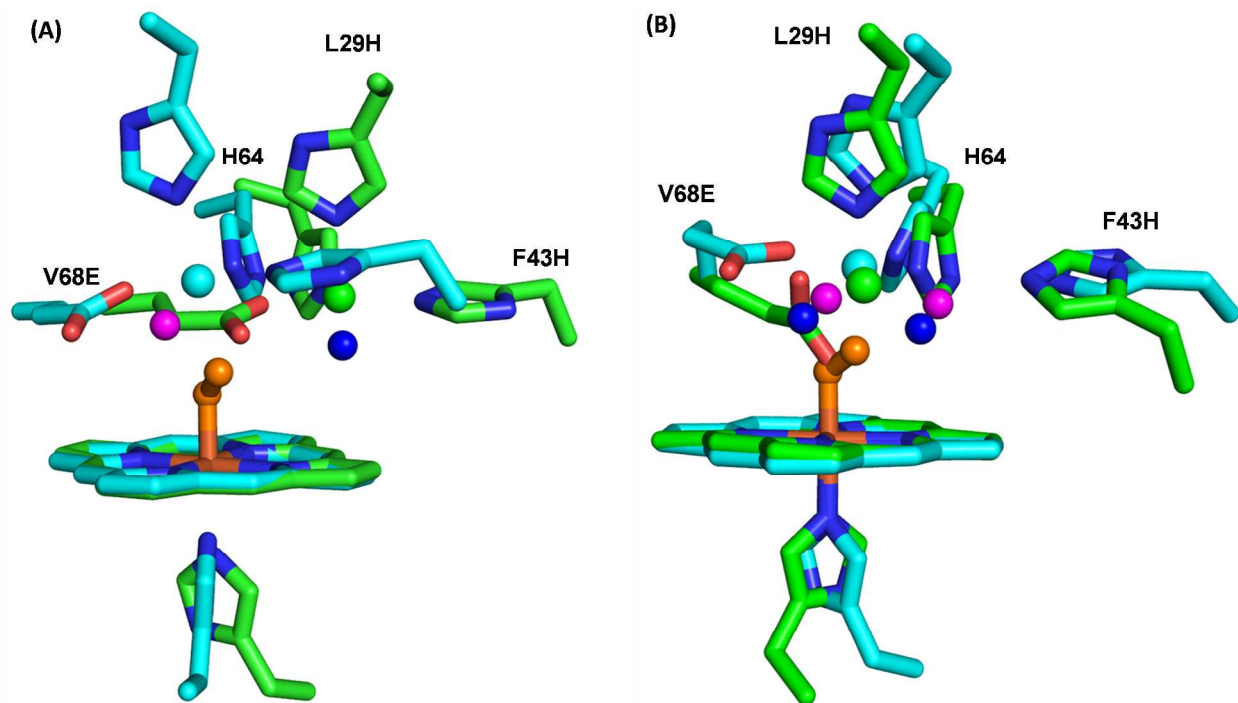

**Figure S9.** Structural overlay of energy optimized active site structures of (A)  $\text{Mn}^{\text{II}}$ - and (B)  $\text{Co}^{\text{II}}$ - $\text{Fe}_8\text{Mb}(\text{Fe}^{\text{II}})$  before and after addition of  $\text{O}_2$ . In (A)  $\text{Mn}^{\text{II}}$ - $\text{Fe}_8\text{Mb}(\text{Fe}^{\text{II}})$  is represented as green and cyan sticks before and after addition of  $\text{O}_2$ , respectively.  $\text{Mn}^{\text{II}}$  is shown as a green or cyan sphere before and after addition of  $\text{O}_2$ , respectively. Water molecules are shown as blue and magenta spheres, before and after addition of  $\text{O}_2$ , respectively. Heme-bound  $\text{O}_2$  is displayed as orange spheres. Main chain and other atoms are not shown for clarity. The same color scheme is used for (B).

**Table S1:** Diffraction and refinement data for Mn<sup>II</sup>- and Co<sup>II</sup>-Fe<sub>B</sub>Mb(Fe<sup>II</sup>)

|                                  | Mn <sup>II</sup> -Fe <sub>B</sub> Mb(Fe <sup>II</sup> ) | Co <sup>II</sup> -Fe <sub>B</sub> Mb(Fe <sup>II</sup> ) |
|----------------------------------|---------------------------------------------------------|---------------------------------------------------------|
| <b>Data Collection</b>           |                                                         |                                                         |
| Source                           | SSRL Beamline BL14-1                                    | SSRL Beamline BL14-1                                    |
| Date                             | 2016-07-20                                              | 2015-06-11                                              |
| Detector                         | CCD, Rayonix MX325HE                                    | CCD, Rayonix MX325HE                                    |
| Wavelength (Å)                   | 1.2                                                     | 1.2                                                     |
|                                  |                                                         |                                                         |
| <b>Data Reduction</b>            |                                                         |                                                         |
| Software                         | HKL2000                                                 | HKL2000                                                 |
| Spacegroup                       | P2 <sub>1</sub> 2 <sub>1</sub> 2 <sub>1</sub>           | P2 <sub>1</sub> 2 <sub>1</sub> 2 <sub>1</sub>           |
| Unit cell (a x b x c; Å)         | 39.785 x 48.422 x 78.45                                 | 39.66 x 47.33 x 76.06                                   |
| Resolution range (highest shell) | 50 – 1.58                                               | 35.16 – 2.00                                            |
| Unique reflections               | 21305                                                   | 14401                                                   |
| Completeness (%)                 | 99.2                                                    | 99.3                                                    |
| Redundancy                       | 4.7                                                     | 4.2                                                     |
| <I/σ(I)>                         | 55.85                                                   | 19.36                                                   |
|                                  |                                                         |                                                         |
| <b>Refinement</b>                | PHENIX                                                  | PHENIX                                                  |
| Resolution range (highest shell) | 39.225 – 1.5799                                         | 35.164 – 1.995                                          |
| Reflections                      | 21252                                                   | 14401                                                   |
| Completeness (%)                 | 99.7                                                    | 76.65                                                   |
| R <sub>work</sub>                | 0.2226                                                  | 0.1941                                                  |
| R <sub>free</sub>                | 0.2519                                                  | 0.2444                                                  |
| Molecules in ASU                 | 1                                                       | 1                                                       |
| RMSD Bonds (Å)                   | 0.006                                                   | 0.007                                                   |
| RMSD Angles (°)                  | 0.902                                                   | 1.554                                                   |

## Computational results

### 1. Resting state:

For  $\text{Co}^{\text{II}}\text{-Fe}_B\text{Mb}(\text{Fe}^{\text{II}})$ , the initial setup of electronic configuration is that  $\text{Co}(\text{II})$  is in high spin ( $S = 3/2$ ) based on the high spin feature of several metal systems with this non-heme site,<sup>1</sup> and  $\text{Fe}(\text{II})$  is in low spin ( $S = 0$ ) based on its six-coordination. The x-ray and the optimized structures for the active site are shown in Figure C1. In the x-ray structure of  $\text{Co}^{\text{II}}\text{-Fe}_B\text{Mb}(\text{Fe}^{\text{II}})$ , Co has a trigonal bipyramidal five-coordinate structure: one with Glu68, two with His29 and His64, and the other two with W39 and W40. W39 forms a hydrogen bond with His43. Glu68 also coordinates with Fe, which is clearly different from the case for Mn where Glu68 does not coordinate with Fe. These structural features are maintained in the optimized structure (see Figure C1), which further supports the x-ray structural finding.

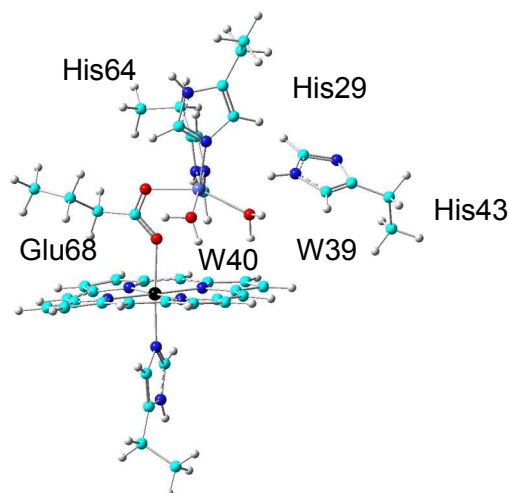

**Figure C1.** Optimized active site structure of  $\text{Co}^{\text{II}}\text{-Fe}_B\text{Mb}(\text{Fe}^{\text{II}})$ .

For  $\text{Mn}^{\text{II}}\text{-Fe}_B\text{Mb}(\text{Fe}^{\text{II}})$ , the initial setup of electronic configuration is similar that  $\text{Mn}(\text{II})$  is in high spin ( $S = 5/2$ ) based on the high spin feature of several metal systems with this non-heme site,<sup>1</sup> and  $\text{Fe}(\text{II})$  is in high spin ( $S = 2$ ) based on five-coordinate deoxymyoglobin spin state. The x-ray and the optimized structures for the active site are shown in Figure C2. In the x-ray structure of  $\text{Mn}^{\text{II}}\text{-Fe}_B\text{Mb}(\text{Fe}^{\text{II}})$ , Mn has a trigonal bipyramidal five coordinating structure, coordinating with Glu68, His29, His43, His64, and W1. However, different from  $\text{Co}^{\text{II}}\text{-Fe}_B\text{Mb}(\text{Fe}^{\text{II}})$ , Glu68 does not coordinate with Fe here. These structural features are also maintained in the optimized structure (see Figure C2), which again supports the x-ray structural finding.

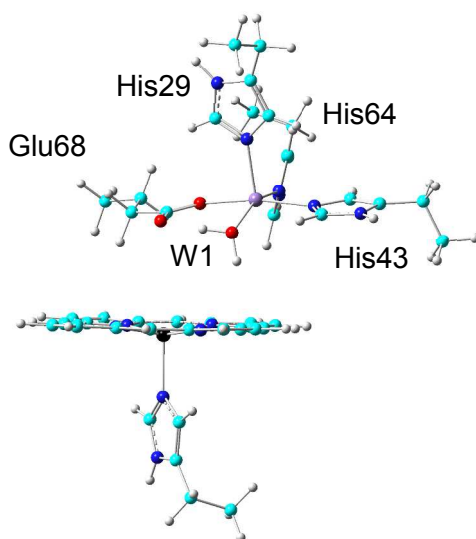

**Figure C2.** Optimized active site structure of  $\text{Mn}^{\text{II}}\text{-Fe}_B\text{Mb}(\text{Fe}^{\text{II}})$ .

## 2. $\text{O}_2$ bound state:

When  $\text{O}_2$  is bonded to both Fe and Co, four different initial electronic configurations were examined, with low spin Fe(III) ferromagnetically and antiferromagnetically coupled to high spin Co(II) or Co(III) respectively, and Fe always anti-ferromagnetic coupled to the  $\text{O}_2$  moiety.<sup>1-3</sup> However, after geometry optimization, all calculations converged to have only Co(II) based on spin densities of  $\sim 2.8$  e indicating  $S = 3/2$ , and thus only two distinctive structures as shown in Figure C3. This is consistent with experiment that Co is not oxidized. In addition, compared with the current method B3LYP which has 18% Hartree-Fock exchange, we examined the results of using two additional functionals, BHandHLYP and BPW91 with 50% and 0% Hartree-Fock exchange respectively. Even with an initial setup as Co(III) for the oxy-bound form, after geometry optimization, in the final results, Co's spin densities of 2.872 e and 2.786 e clearly indicates that it is still Co(II) ( $S=3/2$ ), and thus supports the conclusion of non-oxidized Co(II) by the B3LYP method. The structural results show that when  $\text{O}_2$  is added to the system, the coordination bond between Fe and Glu68 is broken, and  $\text{O}_2$  is coordinated to both Co and Fe. So Co now has an octahedral six-coordination. The O atom in  $\text{O}_2$  coordinated to Fe is named as Ob and the other one is named as Ot. The Gibbs free energy difference of  $\text{Co(II)-Fe}_B\text{Mb-O}_2^- \text{-F}$  (F for ferromagnetic coupling) and  $\text{Co(II)-Fe}_B\text{Mb-O}_2^- \text{-AF}$  (AF for antiferromagnetic coupling) is  $< 1$  kcal/mol. Hence, we will focus on  $\text{Co(II)-Fe}_B\text{Mb-O}_2^- \text{-AF}$  in the following studies. In this case, the O-O bond is elongated by 0.026 Å compared to the empty non-heme metal system,<sup>1</sup> indicating that Co(II) indeed helps activate  $\text{O}_2$  moiety

as found experimentally. This O<sub>2</sub> bound state was found to be thermodynamically stable compared to the resting state with a Gibbs free energy change of -15.71 kcal/mol.

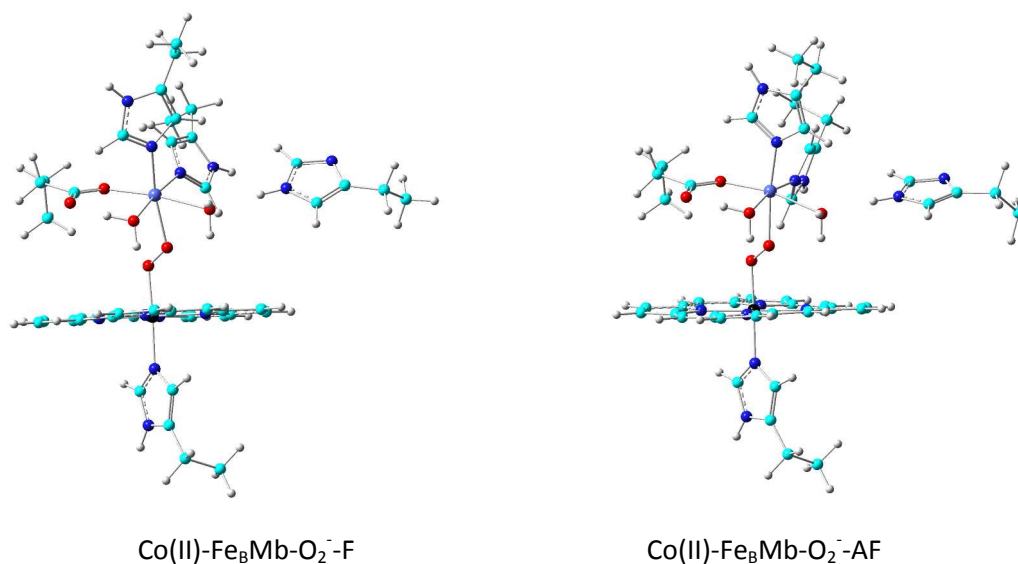

**Figure C3.** Optimized structures of four guesses of Co-Fe<sub>B</sub>Mb-O<sub>2</sub>

For Co system, the schematic electronic configuration of metal 3d orbital/O<sub>2</sub> π interactions is shown below. In addition, as shown in the frontier MO picture below (αHOMO-3, isosurface contour value=±0.02 au), there is clear bonding interaction between Fe d π and O<sub>2</sub> π\* due to electron transfer from Fe<sup>II</sup> to O<sub>2</sub> to form the anti-ferromagnetically coupled Fe<sup>III</sup> and O<sub>2</sub><sup>-</sup>. In contrast, there is no such interaction between Co and O<sub>2</sub> as shown in the same picture.

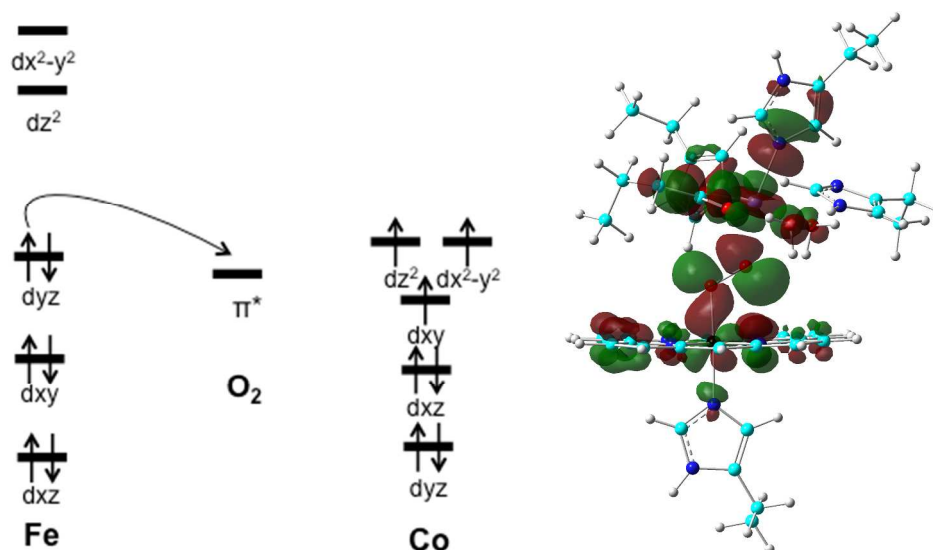

**Figure C4.** Electronic configuration and orbital plots of metal 3d orbital/ $O_2$   $\pi$  interactions.

After  $O_2$  binding, the more centrosymmetric Co(II) site can be seen by the following two changes. First, the coordination number changes from five to six. Second, as shown in the following table, the significantly changed angles (those in red) all become closer to 90 or 180 degrees: the  $N_{E68}\text{-Co-O}_{W3}$  angle is  $15^\circ$  closer to  $180^\circ$ , and  $N_{H29}\text{-Co-O}_{W3}$ ,  $N_{H64}\text{-Co-O}_{W3}$ ,  $N_{E68}\text{-Co-O}_{W40}$  angles have ca.  $4\text{-}11^\circ$  closer to  $90^\circ$ . All other angle changes are smaller than 2 degrees. Such structural changes support the more centrosymmetric feature.

Ligand-Co-Ligand angles in optimized Co- $Fe_B$ Mb and Co- $Fe_B$ Mb- $O_2$  models

|                                | $N_{H29}\text{-Co-}N_{H64}$ | $N_{H29}\text{-Co-}N_{E68}$ | $N_{H29}\text{-Co-}O_{W3}$  | $N_{H29}\text{-Co-}O_{W40}$ |
|--------------------------------|-----------------------------|-----------------------------|-----------------------------|-----------------------------|
| Co(II)- $Fe_B$ Mb              | 99.8                        | 97.3                        | 104.3                       | 89.9                        |
| Co(II)- $Fe_B$ Mb- $O_2^-$ -AF | 99.4                        | 95.6                        | 93.1                        | 89.8                        |
|                                | $N_{H64}\text{-Co-}N_{E68}$ | $N_{H64}\text{-Co-}O_{W3}$  | $N_{H64}\text{-Co-}O_{W40}$ |                             |
| Co(II)- $Fe_B$ Mb              | 96.0                        | 95.7                        | 170.4                       |                             |
| Co(II)- $Fe_B$ Mb- $O_2^-$ -AF | 95.4                        | 91.3                        | 168.1                       |                             |
|                                | $N_{E68}\text{-Co-}O_{W3}$  | $N_{E68}\text{-Co-}O_{W40}$ | $O_{W3}\text{-Co-}O_{W40}$  |                             |
| Co(II)- $Fe_B$ Mb              | 153.3                       | 82.4                        | 82.1                        |                             |
| Co(II)- $Fe_B$ Mb- $O_2^-$ -AF | 168.0                       | 91.2                        | 80.6                        |                             |

Same to the case for Co, when  $O_2$  is bonded to both Fe and Mn, four different initial electronic configurations were examined, with low spin Fe(III) ferromagnetically and antiferromagnetically coupled to high spin Mn(II) or Mn(III) respectively, and Fe always anti-ferromagnetic coupled to the  $O_2$  moiety.<sup>1-3</sup> However, after geometry optimization, three distinctive structures were obtained as shown in Figure C5.

For the two initial Mn(II) structure, only Mn(II)-Fe<sub>B</sub>Mb-O<sub>2</sub><sup>-</sup>-AF is stable with Mn spin density of 4.812 e (S=5/2), while the Mn(II)-Fe<sub>B</sub>Mb-O<sub>2</sub><sup>2-</sup>-F setup results in the oxidized Mn(III)-Fe<sub>B</sub>Mb-O<sub>2</sub><sup>2-</sup>-F with Mn spin density of 4.057 e (S=2). The two Mn(III) structures finished the same as initial configurations with Mn spin density of ~4.0 e (S=2). However, the Mn(II)-Fe<sub>B</sub>Mb-O<sub>2</sub><sup>-</sup>-AF state is of lower Gibbs free energy than the two Mn(III) states by 4.52 (ferromagnetically coupled metals) and 4.72 kcal/mol (anti-ferromagnetically coupled metals). So, in the case of Mn, it is also not oxidized upon O<sub>2</sub> binding, consistent with experiment. In this case, the O-O bond is elongated by 0.024 Å compared to the empty non-heme metal system,<sup>1</sup> indicating that Mn(II) also helps activate O<sub>2</sub> for reaction as found experimentally. This O<sub>2</sub> bound state was found to be thermodynamically stable compared to the resting state with a Gibbs free energy change of -1.43 kcal/mol. So, the heme-oxy intermediate in the case of Co is more stable than that with Mn.

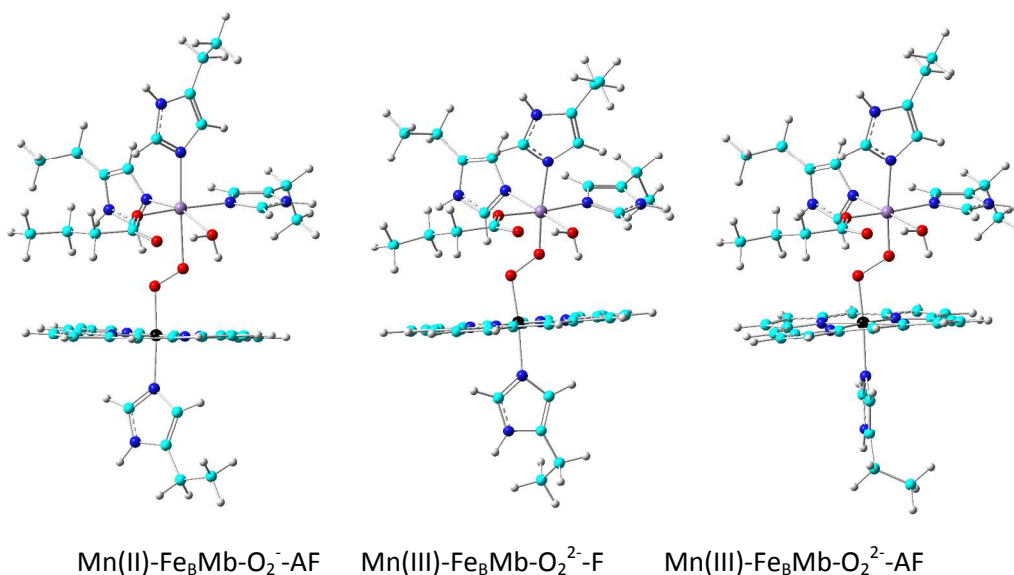

**Figure C5.** Optimized structures of Mn-Fe<sub>B</sub>Mb-O<sub>2</sub>

By using a special computational technique in Gaussian 09, i.e., the constraint C  $\alpha$  atoms are frozen but not fixed, the subsequent frequency calculation following the geometry optimization does not have negative/imaginary values.

For the O<sub>2</sub> binding, as shown below, electronic energies ( $\Delta E$ 's), zero-point energy corrected electronic energies ( $\Delta E_{\text{ZPE}}$ 's), enthalpies ( $\Delta H$ 's), and free energies ( $\Delta G$ 's) all give the same trend: Co system is more stable than Mn.

|                           | Energy change of O <sub>2</sub> binding |                                     |                        |                        |
|---------------------------|-----------------------------------------|-------------------------------------|------------------------|------------------------|
|                           | $\Delta E$<br>kcal/mol                  | $\Delta E_{\text{ZPE}}$<br>kcal/mol | $\Delta H$<br>kcal/mol | $\Delta G$<br>kcal/mol |
| Co(II)-Fe <sub>B</sub> Mb | 0.00                                    | 0.00                                | 0.00                   | 0.00                   |



|                                                           |        |        |        |        |
|-----------------------------------------------------------|--------|--------|--------|--------|
| Co(II)-Fe <sub>B</sub> Mb-O <sub>2</sub> <sup>-</sup> -AF | -25.11 | -23.89 | -24.13 | -15.71 |
| Mn(II)-Fe <sub>B</sub> Mb                                 | 0.00   | 0.00   | 0.00   | 0.00   |
| Mn(II)-Fe <sub>B</sub> Mb-O <sub>2</sub> <sup>-</sup> -AF | -17.80 | -13.69 | -14.71 | -1.43  |

#### References of Computational Section

1. Bhagi-Damodaran, A.; Michael, M. A.; Zhu, Q. H.; Reed, J.; Sandoval, B. A.; Moënne-Loccoz, P.; Zhang, Y.; Lu, Y. *Nature Chem.* **2017**, *9*, 257-263.
2. Ling, Y.; Zhang, Y. Deciphering Structural Fingerprints for Metalloproteins with Quantum Chemical Calculations. In *Annual Reports in Computational Chemistry*; Wheeler, R. A., Ed. Elsevier: New York, 2010; Vol. 6, pp 65-77.
3. Chen, H.; Ikeda-Saito, M.; Shaik, S. *J. Am. Chem. Soc.* **2008**, *130*, 14778-14790.
